# Supplementary material
Source: PubMed Central journal article supplement (PMC7883746)
Supplement: mmc1.pdf [file mmc1.pdf]

**Appendix**  
**Willingness to Vaccinate Against COVID-19 in the U.S.: Representative Longitudinal Evidence From April to October 2020**  
**Daly and Robinson**

**Appendix Table 1.** Number of Participants, Response Rate, and Observations in the Current Study by Survey Month

| <b>Survey period</b> | <b>N</b> | <b>Response rate (%)<sup>a</sup></b> | <b>Observations<sup>b</sup></b> |
|----------------------|----------|--------------------------------------|---------------------------------|
| All time points      | 7,547    | –                                    | 78,453                          |
| April                | 6,313    | 83.6                                 | 12,200                          |
| May                  | 6,652    | 88.1                                 | 13,665                          |
| June                 | 5,592    | 74.1                                 | 6,358 <sup>c</sup>              |
| July                 | 6,177    | 81.8                                 | 7,980 <sup>c</sup>              |
| August               | 6,610    | 87.6                                 | 13,462                          |
| September            | 6,532    | 86.6                                 | 12,759                          |
| October              | 6,458    | 85.6                                 | 12,029                          |

<sup>a</sup>Indicates the percentage of the total sample included in the current study who completed a survey in this month.

<sup>b</sup>Number of observations included in the current study for each month.

<sup>c</sup>The willingness to vaccinate item was not included in the survey waves that aimed to assess responses from June 10–23 (Wave 7) and from July 8–21 (Wave 9) explaining the reduction in observations in June and July.

**Appendix**  
**Willingness to Vaccinate Against COVID-19 in the U.S.: Representative Longitudinal Evidence From April to October 2020**  
**Daly and Robinson**

**Appendix Table 2.** Results of Unadjusted Multinomial Logistic Regression Analyses Examining the Relative Risk of Being Undecided or Unwilling to Vaccinate Against COVID-19 in October Compared to April 2020

| Variable                       | Undecided on vaccination<br>RRR <sup>a</sup> (95% CI) | Unwilling to vaccinate<br>RRR <sup>a</sup> (95% CI) |
|--------------------------------|-------------------------------------------------------|-----------------------------------------------------|
| Overall sample                 | <b>1.82***</b> (1.62, 2.05)                           | <b>2.29***</b> (2.11, 2.48)                         |
| Age group, years               |                                                       |                                                     |
| 18–34                          | <b>1.75***</b> (1.34, 2.27)                           | <b>2.37***</b> (1.98, 2.84)                         |
| 35–49                          | <b>1.84***</b> (1.49, 2.27)                           | <b>2.26***</b> (1.95, 2.62)                         |
| 50–64                          | <b>1.92***</b> (1.56, 2.35)                           | <b>2.54***</b> (2.18, 2.95)                         |
| ≥65                            | <b>2.02***</b> (1.55, 2.65)                           | <b>2.06***</b> (1.73, 2.46)                         |
| Sex                            |                                                       |                                                     |
| Male                           | <b>1.80***</b> (1.48, 2.18)                           | <b>2.12***</b> (1.87, 2.41)                         |
| Female                         | <b>1.90***</b> (1.64, 2.20)                           | <b>2.48***</b> (2.23, 2.76)                         |
| Race/Ethnicity                 |                                                       |                                                     |
| White                          | <b>1.97***</b> (1.72, 2.25)                           | <b>2.32***</b> (2.12, 2.54)                         |
| Hispanic                       | <b>1.89***</b> (1.32, 2.68)                           | <b>2.52***</b> (2.00, 3.17)                         |
| Black                          | <b>1.41*</b> (1.03, 1.92)                             | <b>2.08***</b> (1.62, 2.67)                         |
| Other race/Ethnicity           | <b>3.49***</b> (1.94, 6.29)                           | <b>2.70***</b> (1.79, 4.06)                         |
| Education                      |                                                       |                                                     |
| Degree                         | <b>1.71***</b> (1.32, 2.21)                           | <b>2.09***</b> (1.82, 2.41)                         |
| No degree                      | <b>2.01***</b> (1.75, 2.31)                           | <b>2.52***</b> (2.28, 2.79)                         |
| Income level <sup>b</sup>      |                                                       |                                                     |
| Low income                     | <b>2.01***</b> (1.70, 2.37)                           | <b>2.53***</b> (2.20, 2.92)                         |
| Middle income                  | <b>1.83***</b> (1.48, 2.25)                           | <b>2.17***</b> (1.92, 2.46)                         |
| High income                    | <b>1.70***</b> (1.18, 2.42)                           | <b>2.31***</b> (1.93, 2.77)                         |
| Chronic condition <sup>c</sup> |                                                       |                                                     |
| No                             | <b>1.77***</b> (1.53, 2.05)                           | <b>2.23***</b> (2.02, 2.46)                         |
| Yes                            | <b>1.93***</b> (1.59, 2.34)                           | <b>2.48***</b> (2.15, 2.86)                         |

*Note:* Boldface indicates statistical significance (\* $p < 0.05$ ; \*\* $p < 0.01$ ; \*\*\* $p < 0.001$ ).

<sup>a</sup>RRR, relative risk ratio. For all analyses *willing to vaccinate* was the outcome reference group.

<sup>b</sup>Households earning less than \$40,000 a year classified as low income, those earning \$40,000–\$100,000 middle income, and those above this threshold as high-income.

<sup>c</sup>Diagnosed with any of the following: diabetes, cancer, heart disease, kidney disease, asthma, chronic lung disease, an autoimmune disease.

**Appendix**  
**Willingness to Vaccinate Against COVID-19 in the U.S.: Representative Longitudinal Evidence From April to October 2020**  
**Daly and Robinson**

**Appendix Table 3.** Results of Ordinary Least Squares Analyses Examining the Association Between Predictor Variables and Vaccine Willingness (Continuous Variable) (N=7,547, Obs.=78,453)

| Variable                                   | Willingness to vaccinate <sup>a</sup><br>B (95% CI) |
|--------------------------------------------|-----------------------------------------------------|
| Month (ref=April)                          |                                                     |
| May                                        | -0.25*** (-0.30, -0.21)                             |
| June                                       | -0.31*** (-0.37, -0.25)                             |
| July                                       | -0.36*** (-0.42, -0.31)                             |
| August                                     | -0.44*** (-0.49, -0.39)                             |
| September                                  | -0.57*** (-0.62, -0.53)                             |
| October                                    | -0.60*** (-0.65, -0.55)                             |
| Age group, years (ref=18–34)               |                                                     |
| 35–49                                      | -0.01 (-0.05, 0.04)                                 |
| 50–64                                      | <b>0.14***</b> (0.11, 0.19)                         |
| ≥65                                        | <b>0.38***</b> (0.33, 0.42)                         |
| Sex (ref=male)                             |                                                     |
| Female                                     | -0.18*** (-0.21, -0.15)                             |
| Race/Ethnicity (ref=White)                 |                                                     |
| Hispanic                                   | -0.02 (-0.07, 0.03)                                 |
| Black                                      | -0.50*** (-0.55, -0.45)                             |
| Other race/Ethnicity                       | <b>0.36***</b> (0.30, 0.41)                         |
| Education (ref=degree)                     |                                                     |
| No degree                                  | -0.49*** (-0.52, -0.46)                             |
| Income level (ref=low income) <sup>b</sup> |                                                     |
| Middle income                              | <b>0.05**</b> (0.02, 0.09)                          |
| High income                                | <b>0.27***</b> (0.23, 0.31)                         |
| Chronic condition <sup>c</sup>             | <b>0.12***</b> (0.09, 0.15)                         |

*Note:* Boldface indicates statistical significance (\* $p < 0.05$ ; \*\* $p < 0.01$ ; \*\*\* $p < 0.001$ ). Estimates are derived from ordinary least squares regression with SEs adjusted for clustering at the individual-level and controlling for all characteristics presented.

<sup>a</sup>Outcome ranging from 1=very unlikely to vaccinate, to 5=very likely to vaccinate.

<sup>b</sup>Households earning less than \$40,000 a year classified as low income, those earning \$40,000–\$100,000 middle income, and those above this threshold as high-income.

<sup>c</sup>Diagnosed with any of the following: diabetes, cancer, heart disease, kidney disease, asthma, chronic lung disease, an autoimmune disease.
